# Supplementary material for: Severe impairment of male reproductive organ development in a low SMN expressing mouse model of spinal muscular atrophy
Source: PubMed Central journal article supplement (PMC4735745; doi:10.1038/srep20193), 2016-02-02
Supplement: srep20193-s1.pdf [file srep20193-s1.pdf]

**Severe impairment of male reproductive organ development in  
a low SMN expressing mouse model of spinal muscular  
atrophy**

**Supplementary Figures and Tables**

Eric W. Ottesen, Matthew D. Howell, Natalia N. Singh, Joonbae Seo,  
Elizabeth M. Whitley, and Ravindra N. Singh

## Supplementary Figure Legends

**Supplementary Fig. 1. GO terms enriched in all significantly altered genes.** The length of each bar represents the B+H adjusted  $p$  value of enrichment for each pathway. GO terms are characterized as representing biological processes (a), molecular functions (b), or cellular components (c)

**Supplementary Fig. 2. GO terms enriched in significantly upregulated genes.** The length of each bar represents the B+H adjusted  $p$  value of enrichment for each pathway. GO terms are characterized as representing biological processes (a), molecular functions (b), or cellular components (c)

**Supplementary Fig. 3. GO terms enriched in significantly downregulated genes.** The length of each bar represents the B+H adjusted  $p$  value of enrichment for each pathway. GO terms are characterized as representing biological processes (a) or cellular components (b). No GO terms corresponding to specific molecular functions were significantly enriched.

**Supplementary Fig. 4. Expression of markers of particular cell types.** mRNA expression level of cell-type markers in C/C testes as measured by RNA-Seq. Value is expressed as expression relative to WT. (Statistical significance:  $*p < 0.05$ ;  $**p < 0.01$ ;  $***p < 0.001$ )

**Supplementary Fig. 5. Expression of genes mutated in oligospermia.** mRNA expression level in allele C testes of genes whose mutation causes oligospermia, as measured by RNA-Seq. Value is expressed as expression relative to WT. (Statistical significance:  $*p < 0.05$ ;  $**p < 0.01$ ;  $***p < 0.001$ )

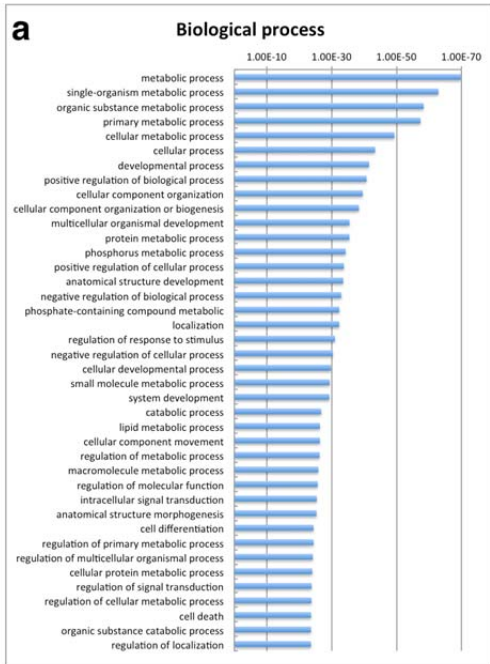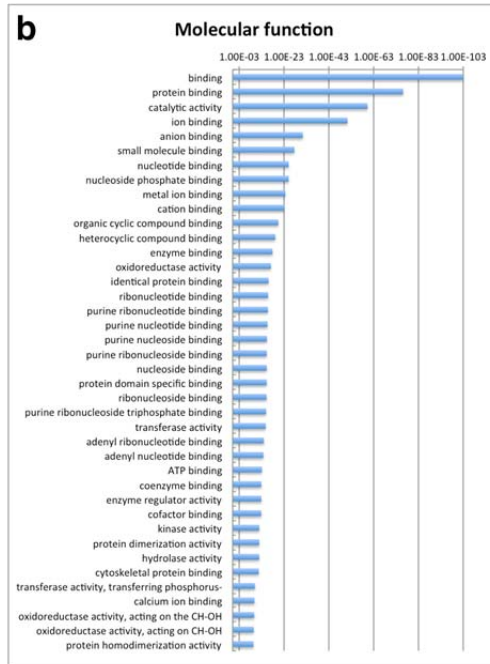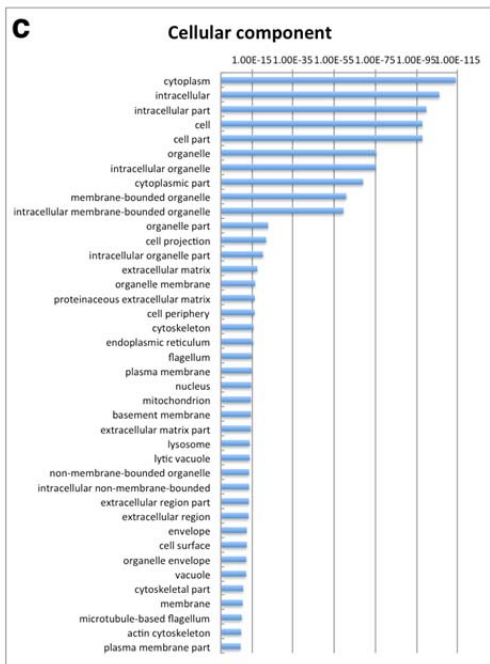

Supplementary Figure 1

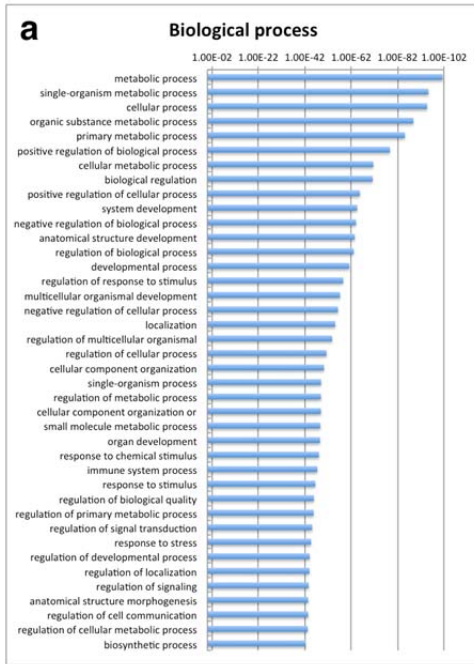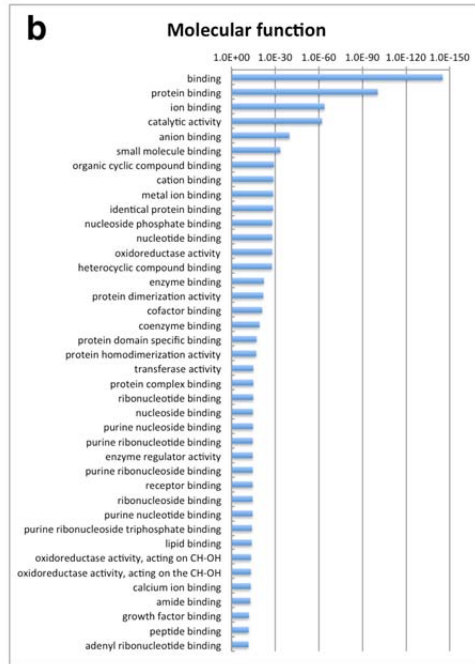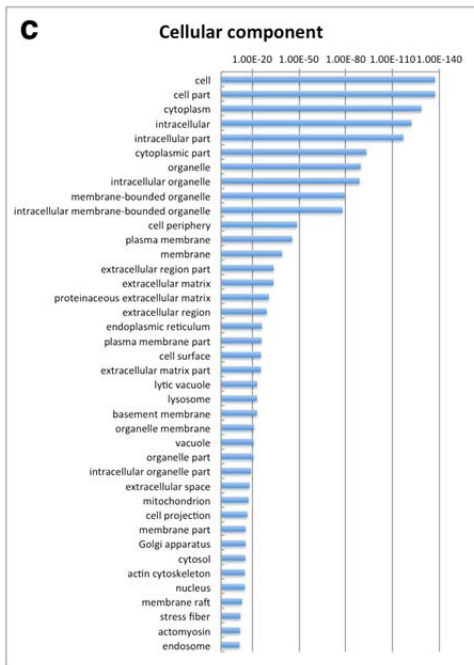

Supplementary Figure 2

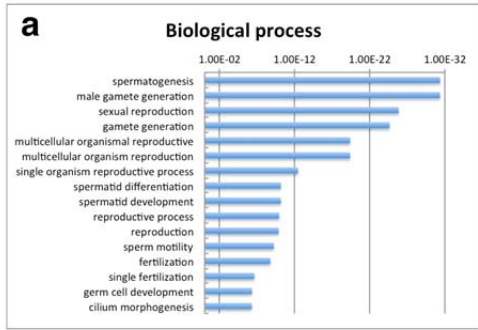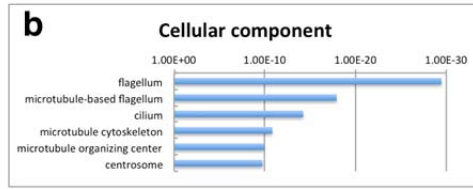

**Supplementary Figure 3**

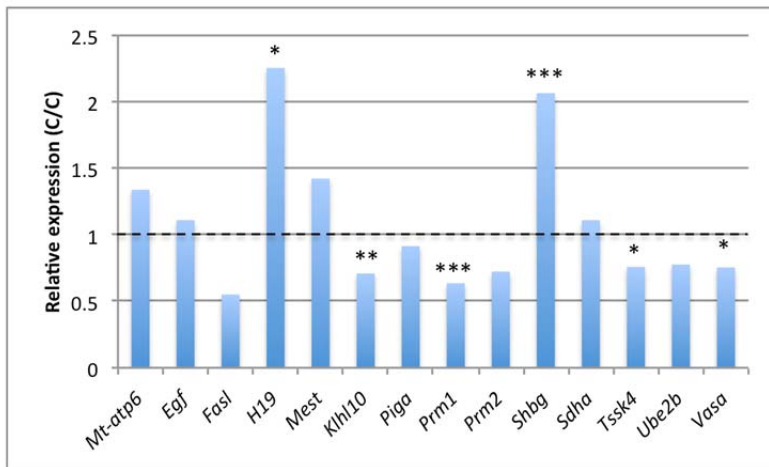

**Supplementary Figure 4**

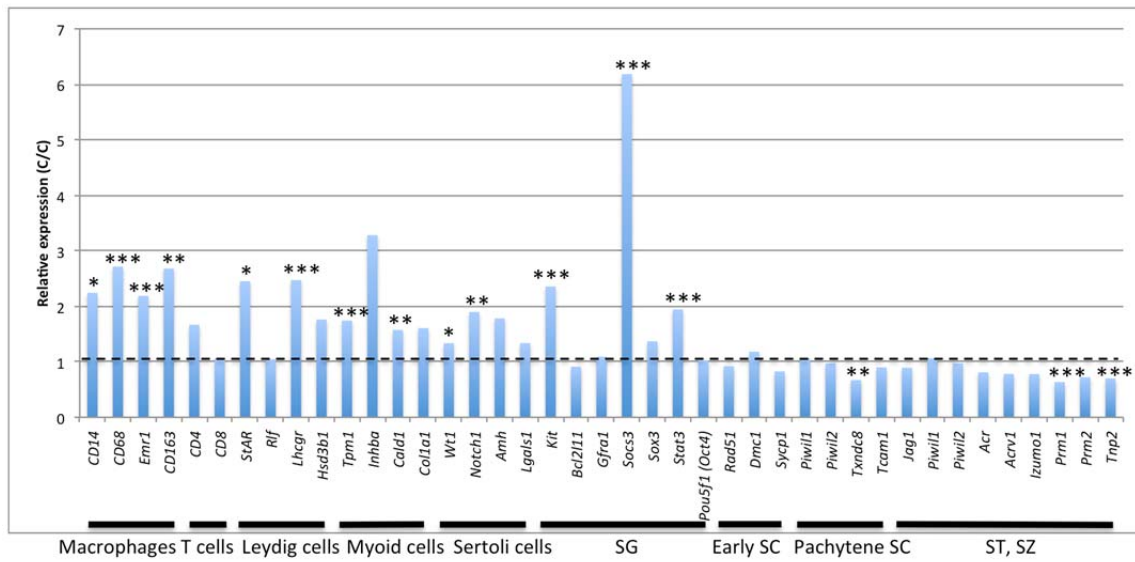

Supplementary Figure 5

| <b>Supplementary Table 1: Details on Male Mice used for Fertility Study</b> |                                 |                                   |                                                    |                              |                                      |
|-----------------------------------------------------------------------------|---------------------------------|-----------------------------------|----------------------------------------------------|------------------------------|--------------------------------------|
| <b>Male</b>                                                                 | <b>Male <i>Smn</i> Genotype</b> | <b>Female <i>Smn</i> Genotype</b> | <b>Total Pups Sired in 90 days (Total Litters)</b> | <b>Relative Testis Mass*</b> | <b>Sperm Count (x10<sup>6</sup>)</b> |
| <b>1</b>                                                                    | WT                              | C/C                               | 11 (3)                                             | 6.4                          | 9.15                                 |
| <b>2</b>                                                                    | WT                              | C/C                               | 15 (2)                                             | 6.31                         | 16.5                                 |
| <b>3</b>                                                                    | WT                              | C/C                               | 13 (2)                                             | 5.62                         | 20                                   |
| <b>4</b>                                                                    | C/C                             | WT                                | 3 (1)                                              | 1.73                         | 0.165                                |
| <b>5</b>                                                                    | C/C                             | WT                                | 0 (0)                                              | 1.5                          | 1.59                                 |
| <b>6</b>                                                                    | C/C                             | WT                                | 0 (0)                                              | 1.72                         | 0                                    |
| <b>7</b>                                                                    | C/C                             | WT                                | 0 (0)                                              | 1.62                         | 0.99                                 |
| <b>8</b>                                                                    | C/C                             | WT                                | 0 (0)                                              | 1.14                         | 1.05                                 |
| <b>9</b>                                                                    | C/C                             | WT                                | 0 (0)                                              | 1.43                         | 1.71                                 |
| <b>10</b>                                                                   | C/C                             | C/C                               | 8 (1)                                              | 2.25                         | 2.4                                  |
| <b>11</b>                                                                   | C/C                             | C/C                               | 0 (0)                                              | 2.02                         | 3.96                                 |

\*Relative testis mass determined by dividing the testis mass by total body weight.



| Supplementary Table 2: Sequencing and mapping of WT and C/C Transcriptome |     |                  |          |         |                   |          |                   |
|---------------------------------------------------------------------------|-----|------------------|----------|---------|-------------------|----------|-------------------|
| Organ                                                                     | Sex | Mouse Identifier | Genotype | Barcode | Millions of reads | % Mapped | % Multiply mapped |
| Testis                                                                    | M   | 817              | WT       | ACAGTG  | 30.54             | 89.56%   | 6.34%             |
|                                                                           | M   | 841              | WT       | ATCACG  | 26.66             | 87.67%   | 6.59%             |
|                                                                           | M   | 1218             | WT       | GCCAAT  | 32.05             | 86.60%   | 6.75%             |
|                                                                           | M   | 1222             | WT       | CGATGT  | 23.75             | 86.29%   | 6.81%             |
|                                                                           | M   | 818*             | C/C      | GATCAG  | 20.92             | 84.22%   | 7.70%             |
|                                                                           | M   | 839              | C/C      | ACAGTG  | 23.49             | 91.80%   | 5.88%             |
|                                                                           | M   | 1395             | C/C      | TAGCTT  | 30.25             | 88.66%   | 5.87%             |
| Liver                                                                     | M   | 841              | WT       | ATCACG  | 25.29             | 79.89%   | 9.70%             |
|                                                                           | M   | 1218             | WT       | GATCAG  | 28.85             | 79.86%   | 12.43%            |
|                                                                           | F   | 826              | WT       | CGATGT  | 25.29             | 80.48%   | 11.40%            |
|                                                                           | F   | 1241             | WT       | GGCTAC  | 20.85             | 81.26%   | 9.98%             |
|                                                                           | M   | 818              | C/C      | ACAGTG  | 26.70             | 79.54%   | 9.88%             |
|                                                                           | M   | 839              | C/C      | ATCACG  | 27.08             | 81.18%   | 11.70%            |
|                                                                           | F   | 827              | C/C      | GCCAAT  | 28.78             | 80.02%   | 12.95%            |
|                                                                           | F   | 1097             | C/C      | CGATGT  | 25.27             | 80.78%   | 10.03%            |
| Brain                                                                     | M   | 817              | WT       | ATCACG  | 37.43             | 86.74%   | 6.65%             |
|                                                                           | M   | 841              | WT       | GATCAG  | 32.32             | 88.05%   | 6.78%             |
|                                                                           | F   | 1241             | WT       | CGATGT  | 31.57             | 86.85%   | 6.94%             |
|                                                                           | F   | 1244             | WT       | TAGCTT  | 36.17             | 92.56%   | 7.06%             |
|                                                                           | M   | 1395             | C/C      | ACAGTG  | 19.12             | 88.65%   | 6.98%             |
|                                                                           | M   | 818              | C/C      | ATCACG  | 31.98             | 94.70%   | 6.25%             |
|                                                                           | F   | 827              | C/C      | GCCAAT  | 27.11             | 87.40%   | 7.25%             |
|                                                                           | F   | 833              | C/C      | CGATGT  | 29.09             | 95.34%   | 6.48%             |

\* - Outlier sample, which was removed from downstream analyses

| Supplementary Table 3: Most highly upregulated genes identified by RNA-Seq |                    |                  |                |                  |
|----------------------------------------------------------------------------|--------------------|------------------|----------------|------------------|
| Gene symbol                                                                | Ensembl ID         | Log2 Fold Change | Standard error | Adjusted P value |
| Hist1h1c                                                                   | ENSMUSG00000036181 | 2.03             | 0.20           | 8.71E-21         |
| Lamb2                                                                      | ENSMUSG00000052911 | 1.67             | 0.17           | 1.67E-19         |
| Ddr1                                                                       | ENSMUSG00000003534 | 1.71             | 0.17           | 1.67E-19         |
| Apoe                                                                       | ENSMUSG00000002985 | 1.92             | 0.19           | 2.26E-19         |
| Cpe                                                                        | ENSMUSG00000037852 | 1.39             | 0.14           | 1.42E-18         |
| Serping1                                                                   | ENSMUSG00000023224 | 1.93             | 0.20           | 1.42E-18         |
| Aldh1a1                                                                    | ENSMUSG00000053279 | 1.47             | 0.16           | 1.14E-17         |
| Sparcl1                                                                    | ENSMUSG00000029309 | 1.70             | 0.18           | 2.28E-17         |
| Aebp1                                                                      | ENSMUSG00000020473 | 1.82             | 0.20           | 8.94E-16         |
| Timp2                                                                      | ENSMUSG00000017466 | 1.12             | 0.13           | 8.45E-15         |
| Wnt6                                                                       | ENSMUSG00000033227 | 1.55             | 0.18           | 1.63E-14         |
| Igfbp3                                                                     | ENSMUSG00000020427 | 2.45             | 0.29           | 1.63E-14         |
| Rcn3                                                                       | ENSMUSG00000019539 | 1.97             | 0.23           | 2.14E-14         |
| Lamb1                                                                      | ENSMUSG00000002900 | 1.43             | 0.17           | 3.76E-14         |
| C1ra                                                                       | ENSMUSG00000055172 | 2.02             | 0.25           | 2.07E-13         |
| Arpc1b                                                                     | ENSMUSG00000029622 | 1.22             | 0.15           | 2.36E-13         |
| Rgs11                                                                      | ENSMUSG00000024186 | 2.16             | 0.26           | 2.43E-13         |
| Clec3b                                                                     | ENSMUSG00000025784 | 2.05             | 0.26           | 8.20E-13         |
| Ildr2                                                                      | ENSMUSG00000040612 | 2.63             | 0.33           | 9.31E-13         |
| Pdgfra                                                                     | ENSMUSG00000029231 | 1.55             | 0.19           | 1.24E-12         |
| Prss35                                                                     | ENSMUSG00000033491 | 1.96             | 0.25           | 1.64E-12         |
| Kit                                                                        | ENSMUSG00000005672 | 1.24             | 0.16           | 2.78E-12         |
| Col6a6                                                                     | ENSMUSG00000043719 | 2.38             | 0.30           | 3.29E-12         |
| Lrp1                                                                       | ENSMUSG00000040249 | 1.39             | 0.18           | 6.16E-12         |
| Lgmn                                                                       | ENSMUSG00000021190 | 1.11             | 0.14           | 1.00E-11         |
| Ndr2                                                                       | ENSMUSG00000004558 | 1.42             | 0.19           | 1.00E-11         |
| Dcn                                                                        | ENSMUSG00000019929 | 1.87             | 0.24           | 1.02E-11         |
| Tspan4                                                                     | ENSMUSG00000025511 | 1.70             | 0.22           | 1.27E-11         |
| Lipg                                                                       | ENSMUSG00000053846 | 1.29             | 0.17           | 1.29E-11         |
| Phlda3                                                                     | ENSMUSG00000041801 | 2.44             | 0.32           | 1.34E-11         |
| Mpeg1                                                                      | ENSMUSG00000046805 | 1.53             | 0.20           | 1.41E-11         |
| 9030617O03Rik                                                              | ENSMUSG00000021185 | 2.73             | 0.36           | 1.59E-11         |
| Sulf2                                                                      | ENSMUSG00000006800 | 1.29             | 0.17           | 2.82E-11         |
| Aox1                                                                       | ENSMUSG00000063558 | 1.53             | 0.20           | 3.04E-11         |
| Kif1c                                                                      | ENSMUSG00000020821 | 1.20             | 0.16           | 3.26E-11         |
| Tshz2                                                                      | ENSMUSG00000047907 | 1.26             | 0.17           | 3.69E-11         |
| Ctsz                                                                       | ENSMUSG00000016256 | 1.77             | 0.24           | 4.75E-11         |

| Supplementary Table 3: Most highly upregulated genes identified by RNA-Seq cont. |                    |                  |                |                  |
|----------------------------------------------------------------------------------|--------------------|------------------|----------------|------------------|
| Gene symbol                                                                      | Ensembl ID         | Log2 Fold Change | Standard error | Adjusted P value |
| Meg3                                                                             | ENSMUSG00000021268 | 1.69             | 0.23           | 5.23E-11         |
| Osr2                                                                             | ENSMUSG00000022330 | 1.73             | 0.23           | 5.23E-11         |
| Lamc3                                                                            | ENSMUSG00000026840 | 1.34             | 0.18           | 5.65E-11         |
| Myh9                                                                             | ENSMUSG00000022443 | 1.18             | 0.16           | 6.22E-11         |
| Vim                                                                              | ENSMUSG00000026728 | 1.08             | 0.15           | 7.12E-11         |
| Aplp1                                                                            | ENSMUSG00000006651 | 1.39             | 0.19           | 9.74E-11         |
| C1qa                                                                             | ENSMUSG00000036887 | 1.89             | 0.26           | 9.81E-11         |
| Timp1                                                                            | ENSMUSG00000001131 | 3.08             | 0.42           | 1.12E-10         |
| Aldh2                                                                            | ENSMUSG00000029455 | 1.24             | 0.17           | 1.13E-10         |
| Cyp27a1                                                                          | ENSMUSG00000026170 | 1.56             | 0.21           | 1.13E-10         |
| Akr1c1                                                                           | ENSMUSG00000025955 | 1.58             | 0.22           | 1.15E-10         |
| Ccdc8                                                                            | ENSMUSG00000041117 | 1.45             | 0.20           | 1.51E-10         |
| Cdkn1a                                                                           | ENSMUSG00000023067 | 1.43             | 0.20           | 1.53E-10         |

| Supplementary Table 4: Most highly downregulated genes identified by RNA-Seq |                    |                  |                |            |
|------------------------------------------------------------------------------|--------------------|------------------|----------------|------------|
| Gene symbol                                                                  | Ensembl ID         | Log2 fold change | Standard error | Adjusted P |
| Tmem56                                                                       | ENSMUSG00000028132 | -1.06            | 0.13           | 1.58E-12   |
| Tmsb15a                                                                      | ENSMUSG00000060726 | -1.23            | 0.17           | 6.05E-11   |
| Hypm                                                                         | ENSMUSG00000040456 | -1.03            | 0.14           | 1.43E-10   |
| Tppp2                                                                        | ENSMUSG00000008813 | -1.02            | 0.14           | 3.04E-10   |
| Oaz3                                                                         | ENSMUSG00000028141 | -0.89            | 0.13           | 3.82E-10   |
| Hist1h1t                                                                     | ENSMUSG00000036211 | -1.55            | 0.22           | 6.97E-10   |
| 1700012A03Rik                                                                | ENSMUSG00000029766 | -1.00            | 0.15           | 2.07E-09   |
| 1700027A15Rik                                                                | ENSMUSG00000101968 | -0.95            | 0.15           | 2.50E-08   |
| Ppp2r2b                                                                      | ENSMUSG00000024500 | -0.92            | 0.15           | 3.62E-08   |
| 1700009N14Rik                                                                | ENSMUSG00000028287 | -0.83            | 0.13           | 3.95E-08   |
| 1700031F10Rik                                                                | ENSMUSG00000047046 | -1.31            | 0.21           | 7.50E-08   |
| 1700015G11Rik                                                                | ENSMUSG00000094445 | -0.81            | 0.13           | 8.62E-08   |
| Spata18                                                                      | ENSMUSG00000029155 | -0.84            | 0.14           | 1.00E-07   |
| Lrrc8b                                                                       | ENSMUSG00000070639 | -0.72            | 0.12           | 2.07E-07   |
| Abcb5                                                                        | ENSMUSG00000072791 | -3.26            | 0.54           | 2.23E-07   |
| 1700016H13Rik                                                                | ENSMUSG00000029320 | -0.75            | 0.13           | 4.34E-07   |
| Yam1                                                                         | ENSMUSG00000098178 | -1.04            | 0.18           | 5.05E-07   |
| Hist1h2ba                                                                    | ENSMUSG00000050799 | -1.06            | 0.18           | 5.44E-07   |
| Clmn                                                                         | ENSMUSG00000021097 | -0.74            | 0.13           | 8.70E-07   |
| Gm23935                                                                      | ENSMUSG00000076258 | -0.95            | 0.17           | 1.14E-06   |
| Pdzd8                                                                        | ENSMUSG00000074746 | -0.72            | 0.13           | 1.37E-06   |
| Nsun4                                                                        | ENSMUSG00000028706 | -0.79            | 0.14           | 1.71E-06   |
| Tnp1                                                                         | ENSMUSG00000026182 | -0.62            | 0.11           | 1.84E-06   |
| H2afb1                                                                       | ENSMUSG00000062651 | -0.72            | 0.13           | 2.16E-06   |
| Lars2                                                                        | ENSMUSG00000035202 | -0.92            | 0.17           | 2.52E-06   |
| Npy                                                                          | ENSMUSG00000029819 | -3.29            | 0.60           | 2.67E-06   |
| 1700020G17Rik                                                                | ENSMUSG00000101801 | -0.86            | 0.16           | 2.79E-06   |
| Gm11780                                                                      | ENSMUSG00000085155 | -0.83            | 0.15           | 2.98E-06   |
| Klk1b8                                                                       | ENSMUSG00000063089 | -0.87            | 0.16           | 3.37E-06   |
| Prom1                                                                        | ENSMUSG00000029086 | -0.68            | 0.13           | 3.79E-06   |
| Prkar2a                                                                      | ENSMUSG00000032601 | -0.72            | 0.13           | 3.79E-06   |
| Cdrt4                                                                        | ENSMUSG00000042200 | -0.73            | 0.14           | 4.09E-06   |
| Gm498                                                                        | ENSMUSG00000031085 | -0.77            | 0.14           | 4.16E-06   |
| BB014433                                                                     | ENSMUSG00000049008 | -0.71            | 0.13           | 4.17E-06   |
| Rpl39l                                                                       | ENSMUSG00000039209 | -0.68            | 0.13           | 4.24E-06   |
| 1700019O17Rik                                                                | ENSMUSG00000036574 | -0.69            | 0.13           | 4.35E-06   |
| Lrrc74a                                                                      | ENSMUSG00000059114 | -0.75            | 0.14           | 4.51E-06   |

| Supplementary Table 4: Most highly downregulated genes identified by RNA-Seq<br>cont. |                    |                     |                   |            |
|---------------------------------------------------------------------------------------|--------------------|---------------------|-------------------|------------|
| Gene symbol                                                                           | Ensembl ID         | Log2 fold<br>change | Standard<br>error | Adjusted P |
| Gm5893                                                                                | ENSMUSG00000011350 | -0.66               | 0.12              | 5.20E-06   |
| 1700001C19Rik                                                                         | ENSMUSG00000047150 | -0.71               | 0.13              | 5.26E-06   |
| Dbil5                                                                                 | ENSMUSG00000038057 | -0.79               | 0.15              | 5.66E-06   |
| St6galnac2                                                                            | ENSMUSG00000057286 | -0.76               | 0.14              | 5.66E-06   |
| Spem1                                                                                 | ENSMUSG00000041165 | -0.77               | 0.14              | 6.10E-06   |
| Bpifa3                                                                                | ENSMUSG00000027482 | -0.80               | 0.15              | 7.41E-06   |
| Lrrc57                                                                                | ENSMUSG00000027286 | -0.74               | 0.14              | 7.52E-06   |
| 1700080E11Rik                                                                         | ENSMUSG00000032566 | -0.84               | 0.16              | 8.56E-06   |
| Akap4                                                                                 | ENSMUSG00000050089 | -0.72               | 0.14              | 9.03E-06   |
| Ubqln1                                                                                | ENSMUSG00000051437 | -0.68               | 0.13              | 9.06E-06   |
| Mir6236                                                                               | ENSMUSG00000098973 | -1.07               | 0.21              | 9.06E-06   |
| Acs11                                                                                 | ENSMUSG00000018796 | -0.71               | 0.14              | 9.07E-06   |
| 1700001K19Rik                                                                         | ENSMUSG00000056508 | -0.74               | 0.14              | 9.60E-06   |

Supplementary Table 5: QPCR validation of RNA-Seq

| Gene   | Selected GO terms/KEGG pathways                           | Allele C relative expression |         |
|--------|-----------------------------------------------------------|------------------------------|---------|
|        |                                                           | QPCR                         | RNA-Seq |
| Unc5b  | Netrin receptor, apoptotic process, axon guidance         | 1.327                        | 1.992   |
| Ntn3   | Receptor binding, axonogenesis                            | 2.292                        | 2.371   |
| Gpx4   | Response to oxidative stress, spermatogenesis             | 0.824                        | 0.727   |
| Casp8  | Apoptotic process, cysteine-type endopeptidase activity   | 2.112                        | 2.277   |
| Bcl3   | DNA damage response, negative regulation of apoptotic     | 2.721                        | 2.141   |
| Spatc1 | Gamma-tubulin binding, centrosome                         | 0.823                        | 0.635   |
| Cdkl2  | Cyclin-dependent protein serine/threonine kinase activity | 0.995                        | 0.697   |
| Hdac7  | B cell activation, histone deacetylation, vasculogenesis  | 1.964                        | 1.798   |
| Bax    | Sertoli cell proliferation, apoptotic process             | 2.171                        | 2.254   |
| Ntn1   | Axon guidance, proteinaceous extracellular matrix         | 1.352                        | 1.529   |
| EphB1  | Axon guidance, angiogenesis, cell adhesion                | 1.956                        | 1.927   |
| HoxD10 | Regulation of transcription, embryonic limb morphogenesis | 2.304                        | 2.813   |
| Mak    | Cyclin-dependent protein serine/threonine kinase activity | 0.892                        | 0.730   |
| Tssk3  | Protein serine/threonine kinase activity, spermatogenesis | 0.900                        | 0.612   |
| Gapdhs | Glycolytic process, sperm motility                        | 0.834                        | 0.659   |
| Sema7a | Axon guidance, integrin binding                           | 1.725                        | 1.987   |
| Itgb1  | Axon guidance, cell-matrix adhesion                       | 1.619                        | 1.778   |
| Npy    | GPCR binding, neuropeptide signaling pathway              | 0.012                        | 0.103   |
| Lamb2  | Integrin binding, axon guidance, basement membrane        | 2.145                        | 3.174   |
| Lss    | Cholesterol biosynthetic process                          | 1.628                        | 1.752   |
| Meg3   | DNA methylation, genetic imprinting                       | 3.225                        | 3.224   |
| Cxcl12 | Chemokine activity, germ cell development, axon guidance  | 3.723                        | 2.747   |
| Ddr1   | Collagen binding, protein tyrosine kinase activity        | 1.737                        | 3.274   |
| Msmo1  | Cholesterol biosynthetic process                          | 2.906                        | 2.517   |
| Neat1  | Protein binding, nuclear body organization                | 1.977                        | 2.009   |
| Slit3  | Axon guidance, cell differentiation                       | 2.217                        | 1.922   |
| Tppp2  | Tubulin binding                                           | 0.679                        | 0.493   |
| Apoe   | Cholesterol homeostasis, lipid homeostasis                | 3.352                        | 3.795   |
| Dhcr7  | Cholesterol biosynthetic process                          | 1.920                        | 2.015   |
| Gm9999 | Unknown function                                          | 0.855                        | 0.624   |
| Ppp3r2 | Calcium-dependent protein SR phosphatase activity         | 0.813                        | 0.752   |
| Oaz3   | Polyamine biosynthetic process                            | 0.773                        | 0.538   |

Supplementary Table 5: QPCR validation of RNA-Seq continued

| Gene        | Selected GO terms/KEGG pathways                        | Allele C<br>relative<br>expression |             |
|-------------|--------------------------------------------------------|------------------------------------|-------------|
|             |                                                        | QPC<br>R                           | RNA<br>-Seq |
| Lipa        | Cholesterol biosynthetic process                       | 2.511                              | 2.092       |
| RP23-402F16 | Unknown function                                       | 0.931                              | 0.558       |
| Fus         | RNA binding                                            | 1.356                              | 1.400       |
| Robo1       | Axon guidance                                          | 1.653                              | 1.667       |
| Srgap1      | Axon guidance, Rho protein signal transduction         | 1.425                              | 0.690       |
| Ppp2r2b     | Apoptotic process, signal transduction                 | 0.757                              | 0.528       |
| Cpe         | Peptidase activity, insulin processing                 | 2.298                              | 2.628       |
| Serping1    | Negative regulation of complement activation           | 4.043                              | 3.798       |
| Dhcr24      | Cholesterol biosynthetic process                       | 1.740                              | 1.928       |
| Malat1      | Regulation of alternative mRNA splicing                | 2.385                              | 1.906       |
| Efnb1       | Axon guidance, cell differentiation                    | 2.576                              | 2.889       |
| Srpk1       | Protein serine/threonine kinase activity, RNA splicing | 0.955                              | 0.852       |
| Lsm2        | RNA splicing                                           | 0.874                              | 0.773       |
| Rbmx12      | RNA splicing                                           | 0.790                              | 0.910       |
| Rbmx        | RNA splicing, DNA-templated transcription              | 1.310                              | 1.558       |
| SFPQ        | RNA splicing, DNA repair, DNA-templated transcription  | 1.186                              | 1.068       |
| Gemin2      | Spliceosomal snRNP assembly                            | 0.903                              | 0.863       |
| Gemin3      | Helicase activity, Spliceosomal snRNP assembly         | 0.996                              | 0.678       |
| Gemin4      | Spliceosomal snRNP assembly                            | 0.729                              | 0.739       |
| Gemin5      | snRNA binding, spliceosomal snRNP assembly             | 0.929                              | 0.843       |
| Gemin6      | Spliceosomal snRNP assembly                            | 0.873                              | 0.777       |
| Gemin7      | Spliceosomal snRNP assembly                            | 1.008                              | 0.994       |
| Gemin8      | Spliceosomal snRNP assembly                            | 1.025                              | 1.037       |
| Ptbp1       | RNA splicing                                           | 1.082                              | 1.124       |
| Ptbp2       | RNA splicing                                           | 1.152                              | 0.845       |
| Hnrnpa1     | RNA splicing                                           | 1.264                              | 1.152       |

| Supplementary Table 6: Primers used for QPCR |                        |                         |
|----------------------------------------------|------------------------|-------------------------|
| Gene                                         | Forward Primer         | Reverse Primer          |
| Gemin2                                       | GGAGAGTGCAGATCGAAGCA   | GCCACTTGTTGTTGTTGCCA    |
| Gemin3                                       | AGTCGGGCACTGGAAAACT    | ACCAGGAGATCCAACAGCAA    |
| Gemin4                                       | GGAAGACCTCAACACGACGT   | GCAGGGAAGGCAGTGAGAAT    |
| Gemin5                                       | ACAGCATAACCCCTGGAAGC   | AGCCAGGACTTTGCCATCTC    |
| Gemin6                                       | GCAACTGGTAACCATGAGCG   | GGCCCATGATTCCAGTCACA    |
| Gemin7                                       | ATCCCCCAGAGTCACAGGAA   | AGGTCTGTGGCTCCAAACTG    |
| Gemin8                                       | AGAGGGAATGAAGCACGGTG   | GGTGGTTGAAGTACAGGCCA    |
| Ptbp1                                        | AGTCTGGAAACCTGGCCTTG   | GATCTTCAGGACGGTGCCAA    |
| Ptbp2                                        | GGCAACAGAGGAAGCAGCTA   | GAACTACTTGCGCACGTTGG    |
| Hnrnpa1                                      | ACGAGAGTCTGAGGAGCCAT   | TCCACTTCTTCCACAGTGGC    |
| Srpk1                                        | ACAAAGCCCAAAGGAAGCCT   | TCCCAGCCCAATTTTCGAA     |
| Lsm2                                         | GGCAAGGATGTAGTCGTGGA   | AGGGTATTTCTCAGGGTCTGTG  |
| Rbmx12                                       | TC TTCATCGGCGGTCTCAAC  | TTCTCGAAGGTGACGAAGGC    |
| Rbmx                                         | GTTCGTAGCAGCAGTGGACT   | TCCATCATCTCTCGGGGACA    |
| Sfpq                                         | GCCAGCAGCAAGAAAAGCAT   | TGTGCCATGCTGAGCAAAC     |
| HisH1C                                       | GGCATCCTGGTGCAAACCAA   | CCTTTTTGGGTGTGGCAGCA    |
| Unc5b                                        | ACGGCCAACACTACACCTGTGT | ACAGAAGGCGCCTCCATTGA    |
| Netrin 1                                     | TGTCTCAACTGCCGCCACAA   | TTGCAGGGACATTGGCCAGT    |
| Netrin 3                                     | ATGCCGCTTCAACATGGAGC   | TGGCAGTCACAAGCTCTGCA    |
| Casp7                                        | AACCGTCCACAATGACTGCTCT | TGTCACGCCATCTTCCCCTAA   |
| Casp8                                        | AGCTGCGGGATCCAGACAAT   | TGCCAGCATGGTCCTCTTCT    |
| Casp9                                        | GGACCGTGACAACTTGAGCAC  | ATCTCCATCAAAGCCGTGACCA  |
| Akt1                                         | ACACCTTTATCATCCGCTGCCT | CTCTTCAGCCCCTGAGTTGTCA  |
| Apaf1                                        | AGAGATCCACACAGGCCATCAC | ATCACACCGTGAACCCAACTCA  |
| Capn2                                        | TTGACGCCAATGAGGAGGACAT | CCACTCCCATCTTCATCCAGCA  |
| Aifm1                                        | CCGTTCCGAGAGTGAGACAGAG | TAGCACAATCCCCACCACAAC   |
| Bcl3                                         | ACAGCGGCCTCAAGAACTGT   | TGGCACTTTGGTCTGGGGAT    |
| Bax                                          | CCCACCAGCTCTGAACAGATCA | TGTCCACGTCAGCAATCATCCT  |
| Fus                                          | AGTTGAAGGGTGAGGCAACAGT | TTCCACCACCCGATTGAAGTC   |
| HoxD10                                       | CGAAGTGCAGGAGAAGGAAAGC | AGCGTTTGGTGCTTGGTGTAAG  |
| EphB1                                        | GCAGCAGGAAACGAGCTTACAG | CGGCTTCATTGGGGTCTCATA   |
| Hdac7                                        | CTCTTGAGCCCTTGACACAGA  | GGGTTTGTAGCGCAACTTCAGG  |
| Spatc1                                       | ACGCCCCACCGAAAAGTCTAA  | TGGCACAGGTCCTCATCCAA    |
| Cdkl2                                        | AGTCTCCAGTCTGGCGTTG    | CGTCACCGACCAGCAGTTCT    |
| Mak                                          | CGAGGCCATCCAGTCTATGA   | CCCGGCAGGCTGATCAAGTA    |
| Tssk3                                        | CTTTGCCAAGGTGCTACCCAAG | ATACAGGACCACCCCATGCTC   |
| H1fnt                                        | GCTAAGGACCTAGTGCGTTCCA | GTA CTGCTGCTCTTTGGCACTG |
| Gpx4                                         | CGCTCCATGCACGAATTCTCAG | GGCCAGGATTCGTAAACCACAC  |



| Supplementary Table 6: Primers used for QPCR continued |                         |                               |
|--------------------------------------------------------|-------------------------|-------------------------------|
| Gene                                                   | Forward Primer          | Reverse Primer                |
| Hist1h1a                                               | TCTACTGCCACGGAGAAACCTG  | CCACTGCGCTCTTTGGAAGAAG        |
| Hils1                                                  | AAATGGTGGCTGGAGACCAAGA  | TTATGTACCCGCTTGTGACCCA        |
| Dnahc8                                                 | AGGCTGAGCTGGATAAAGTGCA  | GGTAGGAGAGAAAGCCTGTGCA        |
| Gapdhs                                                 | GTGTCAGTTGTGGACCTGACCT  | GGGATTGCCGTTAAAGTCCGTG        |
| Efnb1                                                  | AACGTCCAATGGGAGCTTGGAG  | TAGTCAACTGCTCGGGTGTGAC        |
| Sema7a                                                 | CGGAAGCTCTATGTGACCTCCC  | GTGTGGCTCCGCTGGATTAATG        |
| Cxcl12                                                 | GGTAAACCAGTCAGCCTGAGCT  | TTGTTGTTCTTCAGCCGTGCAA        |
| Slit3                                                  | GTGGCGACTGACAAGGACAATG  | CCCACTGTGAAACTGGCCATC         |
| Itgb1                                                  | GTGAGACATGTCAGACCTGCCT  | TCCTTGCAATGGGTACAGGAT         |
| Robo1                                                  | CTCCCCACATAGCAACAGTGA   | GTAGGACACAGCAGCTGGAGAA        |
| Ppp3r2                                                 | GCTGGTGGACAAGAGCATCTT   | AAGTCTTCTTGACCGTGTCTACA       |
| Ppp3cc                                                 | AGGAAGAACCAAGCAACTGGCT  | TGAAGTTTGGGAGCCAGTAGGG        |
| Srgap1                                                 | CTGTACTTCCGAGGGCTGGAAA  | CGTCACTGTACTGGGAGAGGTG        |
| Npy                                                    | CTGACCCTCGCTCTATCTCTGC  | CAGTGTCTCAGGGCTGGATCTC        |
| Tmsb15a                                                | ACCAGACTTGTGCGGAAGTGGAG | ACTCCTTCTCTTGCTCGATGGT        |
| Tppp2                                                  | GGCCAAGAATGCCAGAACCATC  | TGGTGTCTGTCAACCGGTCTAC        |
| Oaz3                                                   | GGATCAAGGCAACCGAGAAAGC  | TCTAACCACCTCGAAGCCCATG        |
| Ppp2r2b                                                | ACCGGAAGATCCAAGCAACAGA  | AACTTGCTGCGGAGGTAGTCAT        |
| Lamb2                                                  | GGGTGAGAGACAGAAGGCAGAG  | ACCGGCAGAGTTCAGAGACTTC        |
| Ddr1                                                   | GACTCCTCTGACACCTTCCCAC  | TGAGAAGCAGCAGCAGGATGAT        |
| Apoe                                                   | GTCACATTGCTGACAGGATGCC  | CTTCCTGGACCTGGTCAGACAG        |
| Cpe                                                    | TCTCTGTGGACGGGATAGACCA  | CAAGCTCAAAGTCCACCCCAAC        |
| Serping1                                               | CCACTTACCTGACGATGCCTCA  | TGGCAGACACCTGAAGATCTGG        |
| Lss                                                    | AGGAGCACGTTTCTCGGATCAA  | AGGGCAGAAACTCAGGTCTGTG        |
| Msmo1                                                  | GCTGTGCAGTCATTGAGGACAC  | GGGATGTGCGTATTCTGCTTCG        |
| Dhcr7                                                  | GCCTGGACCCTCATTAACCTGT  | AAGTGGTCATGGCAGATGTGCA        |
| Lipa                                                   | AATTTTGCTTCAGGCCCGCTAC  | GCGCAAAGCTCCTTCATGATGA        |
| Dhcr24                                                 | GATGGACATCCTGGAGGTGGAC  | GGTCATCAAGCTCAGGCAACAC        |
| Meg3                                                   | CCATCTCCACAGAAGAGCAGCT  | CCCACGCAGGATTCCAGATGAT        |
| Neat1                                                  | TGTTACCATGGCAAGCAGATG   | ACAAGCTGACTTCAACGATGGC        |
| Gm9999                                                 | GGGACCCCTCTGGAAGTAAACA  | TGTGCGATTACTTTATGCGAAACCT     |
| RP23-402F16.1                                          | ATGAAGACTTCTCCACCCAGCC  | CCACCCTACCTACTGTAGTACGC       |
| Malat1                                                 | TTCATGGAGCTGCTCAGGACTT  | ACCTGAAGTCAAGACACCTGCA        |
| Smn                                                    | AGAACAGAACTCAGGAGAATGA  | CTTTCCTGGTCCTAATCCTGA         |
| FL SMN2                                                | TTCCTTCTGGACCACCAATAA   | TCTATGCCAGCATTTCTCCTTAATTTAAG |

| Supplementary Table 7: Primers used for semiquantitative PCR |                          |                          |
|--------------------------------------------------------------|--------------------------|--------------------------|
| Gene                                                         | Forward Primer           | Reverse Primer           |
| Add3                                                         | CTAACCCATTCAGCCACCTC     | CATCATGCATCTCGTCCTTG     |
| Lrrc16a                                                      | CTTCCACCCATCCTCAAAAA     | CTCCCTTGGTGACCATCTTT     |
| Picalm                                                       | GCCAAATGACCTGCTTGACT     | CCAGAATCTACAGCAACATTCG   |
| Wt1                                                          | CCAGCTTGAATGCATGACCTGG   | CTCACTCTCATACCCGTGCGG    |
| Sulf1                                                        | CACACAGTAGAACGGAGCATCT   | ACTAACCTTCCCATCCATCCCA   |
| SMN2                                                         | CGCGGGTTTGCTATGGCGAT     | TTAGTGCTGCTCTATGCCAGCATT |
| Hybrid<br>Smn                                                | GAAGAATGCCACAACCTCCCTTGA | TTAGTGCTGCTCTATGCCAGCATT |
